# Supplementary material for: Landscape Pattern Evolution Processes of Wetlands and Their Driving Factors in the Xiong’an New Area of China
Source: MDPI journal article supplement (doi:10.3390/ijerph18094403), 2021-04-21
Supplement: s1 [file s1]

**Table S1.** Landscape Transfer Matrix of the Xiong'an New Area from 1980 to 2000 (unit: km<sup>2</sup>).

| 1980 \ 2000              | Dry land | Other woodland | Low coverage grassland | High coverage grassland | River | Lake  | Pond | Beach land | Land for urban residents | Land for rural residents | Infrastructure land | Sum     |
|--------------------------|----------|----------------|------------------------|-------------------------|-------|-------|------|------------|--------------------------|--------------------------|---------------------|---------|
| Dry land                 | 1241.44  | 6.37           |                        |                         |       | 6.94  | 0.54 | 10.54      | 9.32                     | 37.75                    | 2.60                | 1315.50 |
| Other woodland           | 0.07     | 4.43           |                        |                         |       |       |      |            |                          |                          |                     | 4.50    |
| Low coverage grassland   |          |                | 0.36                   |                         |       |       |      |            |                          |                          |                     | 0.36    |
| High coverage grassland  |          |                |                        | 0.16                    |       |       |      |            |                          |                          |                     | 0.16    |
| River                    |          |                |                        |                         | 6.91  |       |      |            |                          |                          |                     | 6.91    |
| Lake                     |          |                |                        |                         |       | 2.78  |      | 0.10       |                          |                          |                     | 2.88    |
| Pond                     |          |                |                        |                         |       |       | 1.34 |            |                          |                          |                     | 1.34    |
| Beach land               | 1.83     |                |                        |                         |       | 40.33 | 7.17 | 235.13     |                          | 0.44                     |                     | 284.90  |
| Land for urban residents |          |                |                        |                         |       |       |      |            | 7.81                     |                          |                     | 7.81    |
| Land for rural residents |          |                |                        |                         |       |       |      |            | 1.72                     | 137.36                   |                     | 139.08  |
| Infrastructure land      |          |                |                        |                         |       |       |      |            | 0.42                     |                          | 5.70                | 6.12    |
| Sum                      | 1243.34  | 10.81          | 0.36                   | 0.16                    | 6.91  | 50.05 | 9.05 | 245.77     | 19.26                    | 175.55                   | 8.30                | 1769.57 |

**Table S2.** Landscape Transfer Matrix of the Xiong'an New Area from 2000 to 2017 (unit: km<sup>2</sup>).

| 2000 \ 2017              | Paddy field | Dry land | Other woodland | River | Lake  | Pond  | Beach land | Land for urban residents | Land for rural residents | Infrastructure land | Sum     |
|--------------------------|-------------|----------|----------------|-------|-------|-------|------------|--------------------------|--------------------------|---------------------|---------|
| Dry land                 | 58.23       | 1000.21  | 5.04           | 8.13  | 0.83  | 2.15  | 6.35       | 12.49                    | 129.08                   | 20.82               | 1243.34 |
| Other woodland           | 0.36        | 4.94     | 3.65           | 0.00  |       |       |            | 0.13                     | 1.57                     | 0.15                | 10.81   |
| Low coverage grassland   | 0.14        |          |                |       |       |       |            |                          | 0.22                     |                     | 0.36    |
| High coverage grassland  |             | 0.09     |                |       |       |       |            |                          |                          | 0.06                | 0.16    |
| River                    |             | 3.98     | 0.09           | 2.46  |       |       |            | 0.00                     | 0.38                     |                     | 6.91    |
| Lake                     |             | 0.55     |                | 0.96  | 30.37 | 0.00  | 16.56      |                          | 1.28                     | 0.34                | 50.05   |
| Pond                     |             | 1.17     |                | 0.17  | 0.48  | 5.01  | 1.72       |                          | 0.50                     | 0.01                | 9.05    |
| Beach land               | 13.97       | 85.35    | 0.03           | 4.01  | 29.18 | 3.33  | 97.08      | 0.36                     | 11.76                    | 0.71                | 245.77  |
| Land for urban residents |             | 1.95     |                |       |       |       |            | 17.31                    | 0.00                     |                     | 19.26   |
| Land for rural residents | 1.54        | 44.51    | 0.51           | 0.75  | 0.39  | 0.44  | 1.73       | 1.63                     | 119.67                   | 4.37                | 175.55  |
| Infrastructure land      | 0.03        | 4.92     |                | 0.12  | 0.03  | 0.47  | 0.06       | 0.11                     | 0.16                     | 2.41                | 8.30    |
| Sum                      | 74.27       | 1147.68  | 9.31           | 16.61 | 61.27 | 11.39 | 123.49     | 32.03                    | 264.63                   | 28.89               | 1769.57 |

**Table S3.** Landscape Transfer Matrix of the Xiong'an New Area from 1980 to 2017 (unit: km<sup>2</sup>).

| 1980 \ 2017              | Paddy field | Dry land | Other woodland | River | Lake  | Pond  | Beach land | Land for urban residents | Land for rural residents | Infrastructure land | Sum     |
|--------------------------|-------------|----------|----------------|-------|-------|-------|------------|--------------------------|--------------------------|---------------------|---------|
| Dry land                 | 59.37       | 1025.41  | 8.02           | 8.28  | 4.34  | 2.41  | 10.20      | 20.82                    | 154.10                   | 22.54               | 1315.50 |
| Other woodland           | 0.36        | 2.38     | 0.81           |       |       |       |            |                          | 0.80                     | 0.15                | 4.50    |
| Low coverage grassland   | 0.14        |          |                |       |       |       |            |                          | 0.22                     |                     | 0.36    |
| High coverage grassland  |             | 0.09     |                |       |       |       |            |                          |                          | 0.06                | 0.16    |
| River                    |             | 3.98     | 0.09           | 2.46  |       |       |            | 0.00                     | 0.38                     |                     | 6.91    |
| Lake                     |             | 0.11     |                |       | 1.14  |       | 1.34       |                          | 0.29                     |                     | 2.88    |
| Pond                     |             | 0.28     |                | 0.10  | 0.00  | 0.56  | 0.03       |                          | 0.37                     |                     | 1.34    |
| Beach land               | 12.87       | 78.93    | 0.03           | 5.03  | 55.41 | 7.80  | 110.45     | 0.36                     | 13.00                    | 1.03                | 284.90  |
| Land for urban residents |             | 0.14     |                |       |       |       |            | 7.67                     |                          |                     | 7.81    |
| Land for rural residents | 1.53        | 33.02    | 0.37           | 0.73  | 0.35  | 0.44  | 1.44       | 2.66                     | 95.31                    | 3.22                | 139.08  |
| Infrastructure land      |             | 3.33     |                |       | 0.03  | 0.19  | 0.02       | 0.51                     | 0.16                     | 1.88                | 6.12    |
| Sum                      | 74.27       | 1147.68  | 9.31           | 16.61 | 61.27 | 11.39 | 123.49     | 32.03                    | 264.63                   | 28.89               | 1769.57 |

**Table S4.** Correlation matrix of the driving factors of wetland change

|                 | X <sub>1</sub> | X <sub>2</sub> | X <sub>3</sub> | X <sub>4</sub> | X <sub>5</sub> | X <sub>6</sub> | X <sub>7</sub> | X <sub>8</sub> | X <sub>9</sub> | X <sub>10</sub> | X <sub>11</sub> | X <sub>12</sub> | X <sub>13</sub> | X <sub>14</sub> |
|-----------------|----------------|----------------|----------------|----------------|----------------|----------------|----------------|----------------|----------------|-----------------|-----------------|-----------------|-----------------|-----------------|
| X <sub>1</sub>  | 1              | -0.355         | 0.064          | 0.178          | 0.237          | -0.1           | 0.106          | 0.059          | 0.119          | 0.094           | 0.094           | 0.073           | 0.219           | -0.27           |
| X <sub>2</sub>  | -0.355         | 1              | 0.114          | -0.177         | -0.113         | 0.271          | -0.174         | -0.109         | -0.192         | -0.152          | -0.154          | 0.172           | -0.192          | 0.449           |
| X <sub>3</sub>  | 0.064          | 0.114          | 1              | 0.074          | -0.424         | 0.388          | 0.863          | 0.859          | 0.854          | 0.868           | 0.874           | 0.942           | 0.797           | -0.38           |
| X <sub>4</sub>  | 0.178          | -0.177         | 0.074          | 1              | 0.298          | -0.344         | 0.353          | 0.36           | 0.36           | 0.322           | 0.344           | 0.244           | 0.377           | -0.36           |
| X <sub>5</sub>  | 0.237          | -0.113         | -0.424         | 0.298          | 1              | -0.285         | -0.329         | -0.29          | -0.334         | -0.326          | -0.335          | -0.285          | -0.285          | 0.181           |
| X <sub>6</sub>  | -0.1           | 0.271          | 0.388          | -0.344         | -0.285         | 1              | 0.078          | 0.088          | 0.065          | 0.109           | 0.096           | 0.27            | 0.059           | 0.151           |
| X <sub>7</sub>  | 0.106          | -0.174         | 0.863          | 0.353          | -0.329         | 0.078          | 1              | 0.979          | 0.998          | 0.991           | 0.999           | 0.87            | 0.942           | -0.668          |
| X <sub>8</sub>  | 0.059          | -0.109         | 0.859          | 0.36           | -0.29          | 0.088          | 0.979          | 1              | 0.966          | 0.978           | 0.982           | 0.909           | 0.903           | -0.573          |
| X <sub>9</sub>  | 0.119          | -0.192         | 0.854          | 0.36           | -0.334         | 0.065          | 0.998          | 0.966          | 1              | 0.98            | 0.996           | 0.85            | 0.94            | -0.681          |
| X <sub>10</sub> | 0.094          | -0.152         | 0.868          | 0.322          | -0.326         | 0.109          | 0.991          | 0.978          | 0.98           | 1               | 0.99            | 0.881           | 0.945           | -0.661          |
| X <sub>11</sub> | 0.094          | -0.154         | 0.874          | 0.344          | -0.335         | 0.096          | 0.999          | 0.982          | 0.996          | 0.99            | 1               | 0.881           | 0.935           | -0.647          |
| X <sub>12</sub> | 0.073          | 0.172          | 0.942          | 0.244          | -0.285         | 0.27           | 0.87           | 0.909          | 0.85           | 0.881           | 0.881           | 1               | 0.784           | -0.309          |
| X <sub>13</sub> | 0.219          | -0.192         | 0.797          | 0.377          | -0.285         | 0.059          | 0.942          | 0.903          | 0.94           | 0.945           | 0.935           | 0.784           | 1               | -0.833          |
| X <sub>14</sub> | -0.27          | 0.449          | -0.38          | -0.36          | 0.181          | 0.151          | -0.668         | -0.573         | -0.681         | -0.661          | -0.647          | -0.309          | -0.833          | 1               |

**Table S5.** Eigenvalues and principal component contribution rates

| The principal components | The eigenvalue | contribution /% | Cumulative contribution rate/% | The principal components | The eigenvalue | contribution /% | Cumulative contribution rate/% |
|--------------------------|----------------|-----------------|--------------------------------|--------------------------|----------------|-----------------|--------------------------------|
| 1                        | 8.149          | 58.21           | 58.21                          | 8                        | 0.068          | 0.484           | 99.555                         |
| 2                        | 2.26           | 16.145          | 74.354                         | 9                        | 0.042          | 0.303           | 99.858                         |
| 3                        | 1.11           | 10.929          | 85.284                         | 10                       | 0.012          | 0.085           | 99.943                         |
| 4                        | 0.965          | 3.894           | 89.178                         | 11                       | 0.008          | 0.057           | 99.999                         |
| 5                        | 0.536          | 3.826           | 93.003                         | 12                       | 9.85E-05       | 0.001           | 100                            |
| 6                        | 0.477          | 3.407           | 96.41                          | 13                       | 1.61E-09       | 1.15E-08        | 100                            |
| 7                        | 0.372          | 2.661           | 99.071                         | 14                       | 7.82E-17       | 5.58E-16        | 100                            |

**Table S6.** Principal component load matrix after rotation

| Variable        | The first principal component | The second principal component | The third principal component | Variable        | The first principal component | The second principal component | The third principal component |
|-----------------|-------------------------------|--------------------------------|-------------------------------|-----------------|-------------------------------|--------------------------------|-------------------------------|
| X <sub>11</sub> | 0.983                         | -0.141                         | -0.032                        | X <sub>3</sub>  | 0.908                         | 0.127                          | -0.28                         |
| X <sub>7</sub>  | 0.979                         | -0.168                         | -0.022                        | X <sub>2</sub>  | -0.007                        | 0.875                          | -0.074                        |
| X <sub>8</sub>  | 0.979                         | -0.062                         | 0.017                         | X <sub>14</sub> | -0.586                        | 0.655                          | -0.044                        |
| X <sub>10</sub> | 0.978                         | -0.147                         | -0.044                        | X <sub>1</sub>  | 0.058                         | -0.561                         | 0.173                         |
| X <sub>9</sub>  | 0.97                          | -0.193                         | -0.021                        | X <sub>4</sub>  | 0.377                         | -0.11                          | 0.78                          |
| X <sub>12</sub> | 0.935                         | 0.223                          | -0.054                        | X <sub>5</sub>  | -0.319                        | -0.001                         | 0.735                         |
| X <sub>13</sub> | 0.927                         | -0.297                         | -0.003                        | X <sub>6</sub>  | 0.15                          | 0.33                           | -0.632                        |
